## Regulation of CNS regeneration-associated genes is driven by a temporally changing cast of transcription factors

Authors: Sumona P. Dhara<sup>1</sup>, Andrea Rau<sup>2,3</sup>, Michael J. Flister<sup>4,5</sup>, Nicole M. Recka<sup>1</sup>, Michael D. Laiosa<sup>3</sup>, Paul L. Auer<sup>3</sup>, Ava J. Udvardia<sup>1,6</sup>

<sup>1</sup>Department of Biological Sciences, University of Wisconsin-Milwaukee, Milwaukee, WI 53201, USA

<sup>2</sup>GABI, INRA, AgroParisTech, Université Paris-Saclay, 78350, Jouy-en-Josas, France

<sup>3</sup>Joseph J Zilber School of Public Health, University of Wisconsin-Milwaukee, Milwaukee, WI 53201, USA

<sup>4</sup>Genomic Sciences and Precision Medicine Center, Medical College of Wisconsin, Milwaukee, WI 53226, USA

<sup>5</sup>Department of Physiology, Medical College of Wisconsin, Milwaukee, WI 53226, USA

<sup>6</sup>To whom correspondence may be addressed: [audvardia@uwm.edu](mailto:audvardia@uwm.edu)

### Abstract

In contrast to mammals, adult fish display a remarkable ability to fully regenerate central nervous system (CNS) axons, enabling functional recovery from CNS injury. Both fish and mammals normally undergo a developmental downregulation of axon growth activity as neurons mature. However, fish spontaneously undergo damage-induced “reprogramming” through re-expression of genes necessary for axon growth, guidance, and restoration of functional synaptic connections with target neurons. What remains unknown are the gene regulatory mechanisms that underlie successful reprogramming of adult neurons for functional CNS axon regeneration. Here we present the first comprehensive analysis of gene expression changes (RNA-seq) and DNA regulatory element accessibility (ATAC-seq) in zebrafish retinal ganglion cells (RGCs) at specific time points along the axon regeneration continuum from early growth to target reinnervation. Our analyses reveal a regeneration program characterized by sequential activation of stage-specific pathways, regulated by a temporally changing cast of transcription factors that bind to stably accessible DNA regulatory regions. Strikingly, we also find a discrete set of regulatory regions that change in accessibility, consistent with higher-order changes in chromatin organization that mark (a) the beginning of regenerative axon growth in the optic nerve, and (b) the re-establishment of synaptic connections in the brain. Together, these data provide valuable insight into the regulatory logic driving successful vertebrate CNS axon regeneration, revealing key gene and gene regulatory candidates for therapeutic development.

**Keywords** gene regulatory networks, optic nerve regeneration, chromatin accessibility, zebrafish

### Significance statement

CNS axon damage, due to acute nerve injury or degenerative diseases, often leads to permanent loss of function in human patients. Despite recent discoveries of pathways that promote or inhibit regenerative nerve growth in the mammalian CNS, the capacity for restoring neuronal connections between the retina and the brain after optic nerve damage in mammals remains elusive. Unlike mammals, optic nerve injury in fish induces the re-expression of developmentally downregulated genes that encode proteins important for re-growing and re-establishing axonal connections between the retina and the brain. These studies reveal stage-specific gene regulatory mechanisms associated with regenerating RGCs as they reinitiate axon growth, cross the midline, select appropriate brain targets, and re-establish synapses.

## Introduction

Damage to nerves in the CNS as a result of disease or injury most often results in a permanent loss of function in humans. The loss of function stems from the failure of adult mammalian CNS neurons to support regenerative axon growth. In adult mammalian RGC neurons, genetic manipulations of neuron-intrinsic pathways have shown promise in activating a regenerative state after optic nerve injury (1, 2). However, even under these growth-enhanced conditions, regeneration mostly occurs only in a subset of RGCs (3), with the majority of axons rarely growing beyond a few millimeters. Furthermore, the regenerating axons frequently grow in an undirected manner, resulting in the “regenerated” axons terminating growth far from their appropriate brain targets (4-6). As such, there remains a gap in our understanding of the genetic programs that drive RGC axon regeneration culminating in target re-innervation and recovery of visual function.

In contrast to mammals, zebrafish display a remarkable ability to spontaneously regenerate RGC axons. As opposed to regenerating axons in the growth-enhanced mouse models, regenerating axons in the zebrafish optic nerve successfully navigate across the chiasm and reinnervate target neurons in the optic tectum (7, 8), ultimately leading to functional recovery (9). It is well known that proteins regulating RGC axon growth and guidance in the developing visual system are highly conserved across vertebrate species, and are transcriptionally down-regulated once the mature circuitry has been established (10, 11). In addition, like mammals, optic nerve injury in adult zebrafish induces the expression of axon growth attenuators such as *socs3* in RGCs (12, 13), suggesting that expression of such negative regulators of axon growth is a normal part of the regenerative program. One major difference in response to CNS axon injury between mammals and fish is the re-expression of a genetic program that promotes axon growth and guidance (14, 15). However, we and others have found that the regulation of axon growth-associated genes differs between development and regeneration (16-18). Thus, the difference between mammals and vertebrate species capable of optic nerve regeneration is their ability to reprogram adult RGCs for axon growth in response to optic nerve injury.

It has been established that specific regeneration-associated gene expression changes in the adult zebrafish retina begin within the first day after optic nerve crush and persist through the re-innervation of the optic tectum (19). What is less clear are the genome-wide changes in expression within the RGCs over time as they first grow toward their intermediate target of the optic chiasm and then navigate toward their principal brain target, the optic tectum. Here we present the first comprehensive analysis of gene expression changes (RNA-seq) and DNA regulatory element accessibility (ATAC-seq) in RGCs at specific time points along the axon regeneration continuum from early growth to target reinnervation. Together these data reveal that successful CNS axon regeneration is regulated by stage-specific gene regulatory modules, and punctuated by regeneration-associated changes in chromatin accessibility at stages corresponding to axonogenesis and synaptogenesis.

## Results

### Stage-specific temporal changes in regeneration-associated gene expression

We hypothesized that regeneration-associated gene expression changes in axotomized RGCs would follow a temporal pattern corresponding to the changing requirements of axons as they grow through different environments leading from retina to optic tectum. The timing of successful axon regeneration after optic nerve crush in zebrafish is well characterized (7, 8, 20). To achieve a comprehensive picture of the genetic programming driving successful vertebrate CNS axon

regeneration, we used RNA-seq to identify changes in gene expression that accompanied axon growth in regenerating RGCs at critical time points after optic nerve injury. We specifically examined how transcript expression in naïve retinas compared with that in retinas dissected from fish at 2, 4, 7, and 12 days post-injury (dpi). Based on the previously established regeneration chronologies, our chosen time-points correspond to following stages of optic nerve regeneration: (a) axon growth past the site of injury toward the midline, (b) axon guidance across the midline, (c) selection of axon targets within the brain, and (d) synaptogenesis in the optic tectum ((7, 8, 20); Fig. 1A).

Over the course of the first two weeks after optic nerve injury, we identified thousands of transcripts that displayed regeneration-associated changes in expression with respect to the baseline established from uninjured control retinas (Fig. 1B). Specifically, we found that 7,480 transcripts, roughly 19% of the retinal transcriptome, were differentially expressed in at least one time point (Table S1). At time points corresponding to periods of regenerative axon growth from retina to brain, 2-7 dpi, approximately three to four thousand transcripts were differentially expressed at either higher or lower levels in injured retina when compared to control retinas. At 12 dpi, a time point corresponding to the re-establishment of synaptic connections in the tectum, the number of differentially expressed transcripts was lower, but still exceeded 1,000. These results reveal substantial changes in gene regulatory programming over the course of regeneration.

To visualize the temporal patterns of transcript expression over the full course of axon regeneration from retina to brain, we identified the timing of peak expression for each of the differentially expressed transcripts. This was achieved by calculating the Z-score for normalized transcript counts of individual transcripts in each sample, comparing against the mean derived from all replicates across all time points. Transcripts were then clustered into seven groups based on temporal patterning of Z-scores using the K-means algorithm (Fig. 1C, *Differentially expressed transcripts*; Table S2). As hypothesized, we detected distinct clusters of transcripts that were upregulated in response to injury that displayed peak expression at early, intermediate and late time points during regeneration. We also observed transcripts that were expressed at their highest levels in the uninjured retina and down-regulated early, midway, and later in the regenerative time course. Finally, we observed transcripts expressed in uninjured retina that were down-regulated early in regeneration, but displayed peak expression at the latest stage when regenerating fibers are in the process of synaptogenesis. The temporal patterning of the differentially regulated genes signifies a dynamic program of gene regulation that changes over the course of regeneration.

Given the temporal dynamics in gene expression associated with different stages of regeneration, we queried the data for evidence of stage-specific processes that drive successful regeneration. To identify canonical pathways represented by differentially expressed transcripts in each cluster, we conducted Ingenuity Pathway Analysis (Qiagen, Redwood City, CA). Enriched pathways, based on high stringency criteria ( $-\log(p\text{-value}) > 4$ ), were detected for six out of the seven temporal clusters (Fig. 1C, *Enriched pathways*; Table S3). We found little overlap in enriched pathways between the first three clusters, consistent with the idea of distinct processes active at different stages of regeneration.

Many of the enriched pathways at each time point were consistent with pathways previously associated with axon regeneration and/or developmental wiring of the nervous system. For example, the enrichment of pathways involved in mTOR and cytokine signaling early in regeneration is consistent with results in mammalian models in which activation of these pathways enhances axon growth and survival of RGCs after optic nerve crush (2, 13, 21). Interestingly, PTEN signaling pathway genes are enriched at an intermediate timepoint, consistent with the

down-regulation of mTOR observed as a normal part of the regenerative program in zebrafish (22). At timepoints associated with midline crossing and target selection, we also found an enrichment of pathways involved in cytoskeletal regulation, cell-cell adhesion, and cell-substrate interactions, as would be expected during axon growth and guidance. Simultaneously we see pathways associated with neurotransmitter receptor signaling and G-protein coupled receptor signaling that are downregulated during stages of axon growth and guidance, but are upregulated during synaptogenesis. We also observed downregulation of neuroinflammatory pathways early in regeneration, which may contribute to successful axon regeneration in zebrafish. Taken together, these results demonstrate that post-injury transcriptional programming dictates the timing of stage-specific processes associated with successful CNS axon regeneration.

### **Changes in transcription factor expression, not chromatin accessibility, are associated with temporal patterning of regeneration-associated transcripts**

In order to understand the regulatory system that guides the post-injury transcriptional program, we identified putative regulatory DNA elements (promoters, enhancers and insulators) in RGCs at different stages of regeneration. Assay for Transposase Accessible Chromatin sequencing (ATAC-seq; (23)), was employed to assess chromatin accessibility in nuclei isolated from RGCs. Transgenic zebrafish expressing GFP under the regulation of the *gap43* promoter/enhancer (24) enabled the specific isolation of RGCs from dissociated retinal cells at specific post-injury time points using fluorescence activated cell sorting (FACS).

We detected over 40,000 peaklets representing consensus regions of accessible chromatin in RGCs. The majority of peaks were located in intergenic regions, upstream or downstream from annotated genes (Fig. 2A). Of the peaks located within genes, the vast majority were found within non-coding sequences (Fig. 2A). Approximately 80% of accessible chromatin peaklets were found distal to any annotated genes, consistent with potential function as enhancers or insulators (Fig. S1). Correspondingly, the remaining approximately 20% of peaklets overlapped with 5' UTRs or were located within 1kb of transcriptional start sites, consistent with potential function as promoters (Fig. S1). These results are consistent with previous findings associating chromatin accessible regions with proximal and distal gene regulatory elements (25).

Surprisingly, overall chromatin accessibility changed very little in response to optic nerve injury. In fact, only 233 consensus regions of accessible chromatin (0.5%) were differentially accessible in injured RGCs compared to control RGCs (Fig. 2B; Table S4). All but one of the differentially accessible peaklets were found at 2 dpi or 12 dpi. Most of the differentially accessible peaklets at 2 dpi were differentially open, while most of those at 12 dpi were differentially closed. Furthermore, the overlap between differentially accessible peaklets between the two time points consisted of only two peaklets that were differentially open at both 2 and 12 dpi. Together these results suggest that the accessibility of DNA regulatory elements in RGCs is relatively constant, even under conditions that result in dynamic changes within the transcriptome. Thus, we predicted that the availability of the transcription factors that bind to RGC DNA regulatory elements, rather than the accessibility of the elements, must change over the course of regeneration.

To test the hypothesis that transcription factor expression is differentially regulated at different stages of regeneration, we cross referenced our list of differentially expressed transcripts (Fig. 1C) to a recently compiled list of human transcription factors (26). We discovered 265 definitive transcription factor encoding genes associated with 339 transcripts that were differentially expressed at one or more post-injury time points (Fig. S2, Table S5). We further refined this list to 205 transcripts corresponding to 159 transcription factor encoding genes with defined DNA recognition motifs available in the JASPAR (27) or CIS-BP (28) databases. As predicted, we found

that differentially expressed transcription factors display temporal clustering similar to that of the regeneration-associated differentially expressed transcripts at large (Fig. 2C; Table S6).

Thirty transcription factor families are represented among the transcription factors that were differentially expressed during regeneration. Over half of the differentially expressed transcription factors fall into four families (basic leucine zipper, basic helix-loop-helix, 2-Cys-2-His zinc finger, and homeodomain). Each of these four families of transcription factors included representatives with peak expression early, middle, and late in the regenerative process, as well as those whose expression was down-regulated during regeneration (Figs S3-S6). Within a given transcription factor family, there are frequently binding motif similarities shared between members. However, since transcription factors in these families may function as homo- and/or heterodimers, their binding site affinity and transactivation ability may vary. Thus, a changing cast of transcription factors would have the power to regulate the temporal progression of regeneration-associated gene expression through a common set of accessible regulatory regions.

### **Binding sites for differentially expressed transcription factors are enriched in inferred RGC regulatory elements detected by chromatin accessibility**

To evaluate the potential for temporally expressed transcription factors to regulate stage-specific regeneration-associated gene transcription, we used motif enrichment analysis (29). For each cluster of temporally expressed transcripts we identified potential regulatory elements in the form of accessible chromatin peaklets that were proximal (peaklet center within  $\pm 1$  kb from transcription start site) or distal (peaklet center within  $\pm 100$  kb from transcription start site, but not proximal) to the associated gene. Proximal and distal peaklet sequences were then queried for enrichment of binding motifs of transcription factors with similar temporal expression profiles (Table S7). For transcripts whose expression is upregulated early in regeneration (Fig. 1C, *growth toward the midline* cluster), we found that motifs for 17 out of the 31 transcription factors queried were enriched in the surrounding regions of accessible chromatin (Fig. 3A; Table S7). Motifs for the zinc finger transcription factors, KLF6 and WT1, were detected in over 70% of both proximal and distal elements. Including KLF6, a number of previously identified regeneration-associated transcription factors are both upregulated early in optic nerve regeneration (Fig. 2C) and have binding sites that are enriched within putative regulatory elements surrounding genes that are also upregulated early in regeneration (Fig. 3A, Fig. 1C). Most notable among these are ASCL1 and the basic leucine zipper (bZIP) factors JUN, ATF3, FOSL1, and JUNB. In addition, other transcription factors whose binding sites are enriched include those that have previously been associated with axon growth in developing CNS neurons, such as WT1 and TCF3 (30, 31).

Promoters and enhancers rarely function in response to binding of single transcription factors. This is due both to the propensity of transcription factors within the same family to dimerize, and the existence of multiple transcription factor binding sites within a given promoter or enhancer. To identify potential interactions between regeneration-associated transcription factors, we quantified the frequency with which binding sites for differentially expressed transcription factors co-occurred within putative regulatory elements. For example, although KLF6 and WT1 were the most prevalent binding sites within both proximal and distal peaklets, the co-occurrence rate with binding sites with other transcription factors present in this time window was among the lowest (Fig. 3B). Within distal peaklets, KLF6 and WT1 binding sites frequently co-occurred with those of 2-4 other factors (Fig. 3B, *distal peaks*). By comparison, binding motifs for FOSL1 and JUNB displayed a high frequency of co-occurrence with binding sites for 6-7 other transcription factors (Fig. 3B, *distal peaks*). A similar trend was observed among proximal peaklets, although the differences were less marked (Fig. 3B, *proximal peaks*). These differences suggest the possibility

that binding site composition and potential transcription factor interactions may be distinguishing characteristics of regeneration-associated promoters and enhancers.

We further quantified the frequency of specific co-occurring binding sites. The co-occurrence of members of the same family was expected due to similarities in recognition sequence specificity. This was observed most clearly in the frequency of shared enriched peaklets between KLF6 and WT1 binding sites, and between the bZIP factors (Fig. 3C). However, we also observed frequent co-occurrence of binding sites between members of different transcription families, most notably ASCL1 and NFATC2. These results suggest numerous complex regulatory mechanisms that fine-tune the expression of regeneration-associated genes including: (a) multiple within-family interactions that influence binding site specificity and affinity, as well as transcriptional activity; and (b) a variety of higher order multi-family complexes that may physically and/or functionally interact.

### **Regeneration-associated regulatory sequences target *jun* expression**

Although chromatin accessibility remains mostly stable in RGCs in response to optic nerve injury, we detected a small number of DNA elements in which chromatin accessibility changed in regenerating neurons compared to controls. Intriguingly, the few differentially accessible chromatin peaklets were not evenly distributed across the time points. Instead, most of the elements that became more accessible in response to injury did so at the earliest time point (2 dpi). This led us to postulate a role for these elements in triggering the regenerative growth program. We hypothesized that transcription factors regulated by such elements would not only regulate biological processes necessary for initiation of axon growth, but would also contribute to the regulation of downstream transcription factors that in turn regulate subsequent phases of regeneration.

In order to identify potential transcription factor targets of the regeneration-associated regulatory elements, we ranked the differentially expressed transcription factor genes (Fig. 2C) on the basis of their proximity to the differentially accessible chromatin regions. Surprisingly, *jun* was the only regeneration-associated transcription factor encoding gene that was located within at least 100 kb of a differentially accessible chromatin region. In fact, the *jun* gene is flanked by three peaklets that are differentially open at 2 dpi with respect to controls (Fig. 4A). One peaklet is centered at 148 bp upstream of the transcription start site within the putative promoter, and the two remaining peaklets are located distally, approximately 3.6 kb downstream of the transcription start site. Motif enrichment analysis of these sequences identified a motif for the JUN family of transcription factors, suggesting the potential for autoregulation. We also scanned these sequences for motifs (32) of other regeneration-associated transcription factors whose expression peaks early in regeneration (Fig. 2C, Fig. 3). In addition to JUN binding sites, we found high-scoring matches for KLF6, WT1, SP8, SPIB, FOSL1, JUNB, ATF3, MAX and STAT3 motifs within these sequences. Thus, differential activation of JUN early in regeneration is potentially a consequence of increased accessibility of promoter and enhancer sequences to injury-induced transcription factors.

We next analyzed the putative target genes of JUN for specific functional roles in the regenerative process. Putative JUN targets were identified based on our previous motif analysis (Fig. 3). Gene ontology analysis revealed a number of enriched biological processes consistent with a role for JUN in initiating axon regeneration (Table S8). The most significantly enriched terms include those involved in the regulation of microtubule dynamics and organization of the cytoskeleton, as well as those associated with small GTPase mediated signal transduction (Rho and Rab), and calcium regulation (Fig. 4B). The biological processes associated with potential JUN targets are a distinct subset of those associated with the larger list of all regeneration-associated genes in

the same temporal clusters (Table S9). In the list of inferred JUN transcriptional targets, we also identified 47 regeneration-associated transcription factor encoding genes (Fig. 4C). This list includes 60% of the regeneration-associated transcription factors found in the first two temporal clusters (Fig. 1C). Thus, JUN has the potential for promoting and sustaining the regenerative program through activation of multiple downstream regeneration-associated transcription factors. Together the putative JUN targets suggest a central role for JUN in initiating and supporting successful CNS axon growth.

## Discussion

We have conducted the first combined temporal analysis of chromatin accessibility and transcriptomic changes that accompanies successful optic nerve regeneration. By identifying accessible regulatory elements, coupled with stage-specific transcription factor availability and downstream targets, these results provide a roadmap to the gene regulatory networks governing successful optic nerve regeneration. A major conclusion of this study is that temporally distinct functional modules are regulated by a dynamic cast of regeneration-associated transcription factors binding to regulatory elements that are accessible in naïve and regenerating RGCs. Many of the transcription factors have previously established roles in axon regeneration, while the roles of many more remain to be functionally validated. More than half of these regeneration-associated transcription factors fall into four transcription factor families, each with over 25 members whose peak expression varies in a stage-specific manner. This is the first study that establishes a temporal hierarchy for regeneration-associated transcription factors based on expression patterns of transcription factors, target genes, and binding site accessibility. Future studies that use mass spectrometry approaches to identify stage-specific binding complexes could determine how the relative stoichiometry of individual factors at different stages of regeneration impacts complex formation and transcriptional activity.

Interestingly, the number of regeneration-associated changes in regulatory element accessibility are more than an order of magnitude less frequent in number than regeneration-associated changes in gene expression. Furthermore, the differentially accessible elements are almost exclusively found at 2 dpi and 12 dpi, our earliest and latest timepoints, respectively. Based on the timing and limited number of differentially accessible elements, we postulated a role for these elements in triggering transcriptional programs for axon regrowth and synaptogenesis. We hypothesize at least two mechanisms by which this could occur: (i) The elements may be responsible for initiating the expression of key regeneration-associated transcription factors, which would subsequently regulate other factors in the hierarchy; and (ii) The elements may serve to shift the higher order chromatin structure to reposition enhancers and promoters for the transitions necessary in adult RGCs to reinstate programs for axonogenesis (2 dpi) and synaptogenesis (12 dpi).

Our data contain evidence supporting both hypotheses. Supporting the first hypothesis, we find that the gene encoding transcription factor JUN is flanked by promoter and distal enhancer elements that increase in accessibility during axon regeneration. Supporting our second hypothesis, we find that roughly half the differentially-accessible regions at both early and late times are enriched in CTCF binding sites. CTCF is a transcription factor that has recently been implicated in mediating chromatin looping and marking the boundaries of topologically associating domains (33). A logical next step would be to functionally validate interactions between the predicted *jun* promoter and enhancers, as well as additional long-range regulatory interactions between stably and differentially accessible elements using chromatin capture and genome editing technologies.

These data provide a roadmap for the identification of key combinations of transcription factors necessary to reprogram adult RGCs for optic nerve regeneration. Similar approaches have been employed to discover transcription factors necessary for direct reprogramming of somatic cells to produce motor neurons (34). However, to our knowledge, this is the first gene regulatory network analysis of optic nerve regeneration that couples temporal analysis of gene expression with the identification of putative regulatory interactions based on chromatin accessibility and transcription factor expression. We expect that these findings may be applicable to neurons in other regions of the CNS undergoing regenerative axon growth, such as the spinal cord and brain. In order to facilitate comparisons between our data and those derived from other regenerative models, we have created an interactive web application (*Regeneration Rosetta*; <http://ls-shiny-prod.uwm.edu/rosetta/>; (35)). This app enables users to upload a gene list of interest from any Ensembl-supported species and determine how those genes are expressed and potentially regulated in the context of optic nerve regeneration. Such cross-species and cross-system analyses will facilitate identification of novel pathways specifically associated with successful CNS regeneration.

## Materials and Methods

### Zebrafish husbandry and maintenance

Zebrafish husbandry and all experimental procedures were approved by the *Institutional Animal Care and Use Committee* (IACUC). Zebrafish colonies were maintained as previously described (36). Adult fish were housed in recirculating rack systems (Aquatic Habitats, Apopka, FL) at 28.5°C on a 14-hour light, 10-hour dark cycle, and fed twice daily with Adult Zebrafish Complete Diet (VWR, West Chester, PA) and once daily with brine shrimp (*Artemia*). A wild type strain (Ekkwill, EK) was used as a negative control for FACS. A transgenic reporter strain constructed on the EK background, Tg (*Tru.gap43:egfp*) mil1, or *fgap43:egfp* (24) was used for all other experiments.

### Zebrafish optic nerve injury

Optic nerve crush (ONC) lesions were performed on adult zebrafish, 7-9 months of age, as previously described (16). Briefly, fish were anesthetized in 0.46 mg/mL tricaine (Argent Chemical Labs, Redmond, WA) in 30% Danieau (37). The left optic nerve of anesthetized fish was exposed and crushed for 10 seconds using Dumont #5 forceps. The intact retina of an uninjured fish served as the unoperated control (0dpi). Fish were sacrificed 0, 2, 4, 7, or 12 days post injury (dpi) and retinas were dissected. Prior to dissection, left and right eyes of the fish were examined under Nikon eclipse TE2000-U fluorescence microscope for GFP fluorescence as an indicator of regeneration-induced transcriptional activity. GFP was easily detected through the lens in eyes which had previously undergone optic nerve crush (Fig. S3).

### RNA-seq data generation

*RNA Isolation.* RNA was extracted and purified from retinas dissected from naïve (0 dpi) and regenerating adult fish at 2, 4, 7, and 12 dpi. Three biological replicates of RNA were obtained for each time point. To prevent RNA degradation, dissected retinas were immediately immersed in an RNA stabilization reagent (RLT buffer of RNeasy Micro Kit, Cat No./ID 74004, Qiagen; Valencia, CA). The retinas were homogenized (sterile Fisherbrand™ RNase-Free Disposable Pellet Pestles Cat No.12-141-368) and filtered (Cat No./ID: 79654, Qiagen). Total RNA was



extracted from the homogenized mixture according to manufacturer instructions (RNeasy Micro Kit, Cat No./ID 74004, Qiagen). Total RNA concentration and purity were quantified with NanoDrop ND2000 spectrophotometer (Thermo Scientific) and QuBit fluorometer (Invitrogen), respectively. RNA integrity was quantified using 2100 Bioanalyzer (Agilent High Sensitivity RNA 6000 Pico Reagents Cat No. 5067-1514). For each biological replicate, 3-6 retinas were pooled, cleaned and concentrated (RNA Clean & Concentrator kit, SKU R1013, Zymo Research) to obtain 1 ug total RNA. Total RNA concentration, purity, and integrity of pooled samples was determined as described above. Only samples with RNA integrity numbers (RIN) ranging from 7.7 to 8.2 were used for sequencing (Table S10).

*Library preparation and sequencing.* cDNA libraries (n=3 for 0, 2, 4, 7, and 12 dpi) were generated using Tru-Seq Stranded Total & mRNA Sample Prep Kits, (Illumina 20020595) at University of Wisconsin-Madison Biotechnology Center (UWBC). Each cDNA library was indexed for multiplexing and subsequently sequenced on four lanes of the Illumina HiSeq2000 device, UWBC. Libraries were sequenced at 50 bp, 30–40 million paired-end reads/sample, on Illumina HiSeq 2500 at UWBC, Madison.

*Bioinformatic analysis.* After merging technical replicates of RNA-seq samples across lanes, TrimGalore (v0.4.4, --stringency 3 -q 20) was used in paired-end mode to trim adaptor sequences, FastQC (v0.11.5) was used to validate sequence quality, and Kallisto (38) (v0.42.4) was used to build an index on a FASTA file consisting of the zebrafish transcriptome (GRCz10 Danio rerio genome assembly, Ensembl release 84 annotation) and the transgene sequence (Fig. S4). Kallisto was subsequently used to quantify transcript abundances using 500 bootstrap samples.

## **ATAC-seq data generation**

*Cell sorting.* RGCs were collected from dissociated regenerating and control retinas, at each time point using fluorescent activated cell sorting (FACS). Zebrafish were sacrificed, and retinas were dissected and immersed in ice cold PBS with no calcium and magnesium. To one well of a 24-well plate, a single retina (divided into 8 uniform pieces) was added to 500 uL Accumax (STEMCELL Technologies). Each retina was chemically digested for 70 mins with agitation on a nutator. Reactions were quenched in heat inactivated fetal calf serum (HI-FCS; Gemini Bio-Products) in DMEM/F12 (Gibco) and lysates were mechanically dissociated by gentle pipetting. Undigested fragments were removed, and the cell suspension was pelleted at 200 g for 3 min. Supernatant was aspirated and the pellet re-suspended in 100 µl fresh quenching buffer (DMEM/F12 + 20% FCS). Cell suspensions from multiple retinas at each time point were pooled (0 dpi, 8-10 retina; 2, 4, 7, and 12 dpi, 4-6 retinas), filtered (Falcon, Cat No. 352235), and sorted for RGCs expressing GFP using a Becton Dickinson FACSAria™ III sorter. Negative control cells were used to set gates to separate GFP positive (GFP+) from GFP negative (GFP-) fractions. We collected 50,000 FACS-sorted GFP+ cells per sample that were immediately used for chromatin isolation as described below. Three biologically distinct replicates of pooled cells were collected for each time point.

*Library preparation.* ATAC-seq libraries were prepared using the Tn5 transposase system (Nextera DNA library kit, Illumina, FC-121–1030) as previously described (23), and purified using DNA Clean & Concentrator kit (SKU: ZD5205, Zymo). The purified samples were assessed for quality as described above (NanoDrop ND2000 spectrophotometer and QuBit fluorometer) and appropriate nucleosomal laddering was determined by 2100 Bioanalyzer (Agilent High Sensitivity DNA Kit, Cat No. 5067-4626) (Table S11). For PCR amplification and qPCR side reactions, PerfeCTa SYBR Green FastMix Quanta (VWR Cat No. 101414-150) was used (Table S12 for PCR Primers).

**Sequencing.** Prior to running the full sequence, Mi-seq was used to estimate sequencing depth. One sample was below the cut-off criteria and therefore omitted. The remaining fourteen samples were indexed for multiplexing and subsequently sequenced on four lanes of the Illumina HiSeq2000, UWBC. Data were sequenced at 50 bp to obtain approximately 25 million paired-end reads/samples.

**Bioinformatic analysis.** After merging technical replicates of ATAC-seq samples across lanes, TrimGalore (v0.4.4, --stringency 3 -q 20) was used in paired-end mode to trim adaptor sequences and FastQC (v0.11.5) was used to validate sequence quality. BWA-MEM (39) (v0.7.9a-r786) was used to align reads to the zebrafish genome (GRCz10) and transgene sequence. Duplicate and multiple mapped reads were removed using samtools (v1.6) (40). After concatenating aligned reads across all replicates and time points, MACS2 (41) (v2.1.1.20160309, --no-model -g 1.37e+09 --keep-dup all --call-summits) was used in paired-end mode without shifting model to call peaks from aligned reads, and summits of deconvoluted subpeaks were identified. Only peaks with a p-value <  $10^{-10}$  were retained for subsequent analyses. For each remaining subpeak summit, a 500bp “peaklet” interval was defined using [summit - 250bp, summit + 249bp] using GenomicRanges (v1.30.3) (42). We refer to these peaklets as consensus regions of accessible chromatin. Open chromatin in each replicate of each time point was then quantified using DiffBind (v2.6.6, default parameters) by counting the number of overlapping reads for each retained peaklet.

### **Statistical analysis of RNA-seq and ATAC-seq data**

Following pseudoalignment and quantification of transcripts, differentially expressed transcripts were identified using Sleuth (v0.29.0) (43). Specifically, a full model, including a factor for each time point after injury (2, 4, 7, 12 dpi), was estimated for each transcript, and a Wald test was calculated for each coefficient to identify significant differences with the initial time point (0dpi). After controlling the false discovery rate (FDR) at 5% within each comparison using the Benjamini-Hochberg (44) approach, differentially expressed transcripts with respect to the baseline were identified for each post-injury time point. Beta values from the model were used as a biased estimator of log-fold change. Expression heatmaps (based on Z-scores calculated using either log fold-changes or log transcripts per million [TPM] estimates) were produced using ComplexHeatmap (45) (v1.17.1), where transcript clusters were identified using the K-means algorithm, and hierarchical clustering (Euclidean distance, complete linkage) was used to cluster rows. The Ingenuity Pathway Analysis tool (Qiagen, Redwood City, CA, USA) was used to analyze enrichment of molecular and functional gene networks within the differentially expressed gene sets (FDR<0.05) at each time point after injury (2, 4, 7, 12 dpi) compared with the initial time point (0dpi).

After quantifying peaklet accessibility, DESeq2 (v1.18.1) (46) was used to identify differentially accessible peaklets in an analogous manner to the RNA-seq analysis described above. As before, a full generalized linear model including a factor for each post-injury time point was estimated for each peaklet, and a Wald test was calculated for each coefficient to determine significant differences in accessibility compared to the baseline. Peaklets with FDR-controlled p-values < 0.05 in one of the four comparisons were considered to be differentially accessible. ChIPpeakAnno (v3.12.7) (46, 47), the TxDb.Drerio.UCSC.danRer10.refGene UCSC annotation package (v3.4.2), and AnnotationHub (v2.10.1) were used to annotate peaklets with genes. Specifically, non-exonic (i.e., not overlapping exons by more than 50bp) peaklets overlapping a transcription start site (TSS) or within 1kb of a TSS were considered to represent proximal peaks, whereas those greater than 1kb but less than 100kb of a TSS were considered to represent distal

peaks. All statistical analyses were performed in R (v3.4.3). Integrative Genome Viewer (IGV) was used to visualize RNA-seq and ATAC-seq alignments (48).

We used motif analysis to determine potential binding sites of our differentially expressed transcription factors within regions of accessible chromatin identified by ATAC-seq. Motif enrichment and discovery was carried out using various applications within the MEME Suite of motif-based sequence analysis tools (version 5.0.4; (49)). We compiled a user-supplied file for motifs corresponding to the transcription factors we identified as differentially expressed (Fig. 2), for which there were existing motifs in JASPAR or CIS-BP databases (Table S7). Motifs were formatted to MEME Motif format as specified with the MEME suite applications ([meme-suite.org](http://meme-suite.org)). The Analysis of Motif Enrichment (AME) tool was used to determine motif enrichment in accessible chromatin surrounding genes in each temporal cluster (Fig. 1C ; (29)). FASTA files of 500 bp peaklet sequences located proximal ( $\leq 1$  kb from transcription start site) or distal (within  $> 1$  kb, but  $\leq 100$  kb, from transcription start site) from differentially expressed genes were used in conjunction with our user-supplied motif file. Analysis was run using average odds score sequence scoring and Fisher's exact test for motif enrichment. The AME tool was also used to identify motifs within the differentially accessible chromatin regions surrounding the *jun* gene (Fig. 4), using both our user supplied motif file and the built in motif file for Eukaryotic DNA, Vertebrates (*in vivo* and *in silico*). The Find Individual Motif Occurrences (FIMO) tool (32) was used to scan for additional binding sites with the putative *jun* promoter and enhancers sequences using our user-supplied motif list. AME and FIMO analysis were both run using default parameter settings.

### Data availability

Raw sequencing files for the RNA-seq and ATAC-seq data will be submitted upon publication to the Sequence Read Archive (SRA). All scripts used to process and analyze the RNA-seq and ATAC-seq data may be found at [https://github.com/andreamrau/OpticRegen\\_2019](https://github.com/andreamrau/OpticRegen_2019). The *Regeneration Rosetta* app may be accessed at <http://ls-shiny-prod.uwm.edu/rosetta/>, and all associated source files for creating the app may be found at <https://github.com/andreamrau/rosetta>.

### Acknowledgements

We thank the [UWM High Performance Computing \(HPC\) Service](#) for computing resources used in this work. We are grateful to Heather Leskinen and Sarah Sarich for comments on the manuscript and edits to the material and methods. We wish to thank the University of Wisconsin Biotechnology Center DNA Sequencing Facility, Madison for providing RNA and ATAC sample sequencing facilities. We gratefully acknowledge support from the Research Growth Initiative Grant RGI (to A.J.U. and P.L.A.), University of Wisconsin-Milwaukee. A.R. was supported by the AgreeSkills+ fellowship program, which received funding from the EU's Seventh Framework Program under grant agreement number FP7-609398 (AgreeSkills+ contract). S.D. was supported by the Clifford H. Mortimer Award, University of Wisconsin-Milwaukee.

## References

1. Leibinger M, *et al.* (2017) Boosting CNS axon regeneration by harnessing antagonistic effects of GSK3 activity. *P Natl Acad Sci USA* 114(27):E5454-E5463.
2. Sun F, *et al.* (2011) Sustained axon regeneration induced by co-deletion of PTEN and SOCS3. *Nature* 480(7377):372-U125.
3. Duan X, *et al.* (2015) Subtype-Specific Regeneration of Retinal Ganglion Cells following Axotomy: Effects of Osteopontin and mTOR Signaling. *Neuron* 85(6):1244-1256.
4. Luo XT, *et al.* (2013) Three-dimensional evaluation of retinal ganglion cell axon regeneration and pathfinding in whole mouse tissue after injury. *Exp Neurol* 247:653-662.
5. Pernet V, *et al.* (2013) Long-distance axonal regeneration induced by CNTF gene transfer is impaired by axonal misguidance in the injured adult optic nerve. *Neurobiol Dis* 51:202-213.
6. Trakhtenberg EF, *et al.* (2018) Zinc chelation and Klf9 knockdown cooperatively promote axon regeneration after optic nerve injury. *Exp Neurol* 300:22-29.
7. Diekmann H, Kalbhen P, & Fischer D (2015) Characterization of optic nerve regeneration using transgenic zebrafish. *Front Cell Neurosci* 9.
8. Lemmens K, *et al.* (2016) Matrix metalloproteinases as promising regulators of axonal regrowth in the injured adult zebrafish retinotectal system. *Journal of Comparative Neurology* 524(7):1472-1493.
9. Kaneda M, *et al.* (2008) Changes of phospho-growth-associated protein 43 (phospho-GAP43) in the zebrafish retina after optic nerve injury: a long-term observation. *Neurosci Res* 61(3):281-288.
10. Erskine L & Herrera E (2014) Connecting the retina to the brain. *ASN Neuro* 6(6).
11. Skene JH (1989) Axonal growth-associated proteins. *Annu Rev Neurosci* 12:127-156.
12. Elsaiedi F, Bembem MA, Zhao XF, & Goldman D (2014) Jak/Stat signaling stimulates zebrafish optic nerve regeneration and overcomes the inhibitory actions of Socs3 and Sfpq. *J Neurosci* 34(7):2632-2644.
13. Smith PD, *et al.* (2009) SOCS3 deletion promotes optic nerve regeneration in vivo. *Neuron* 64(5):617-623.
14. Bernhardt RR, Tongiorgi E, Anzini P, & Schachner M (1996) Increased expression of specific recognition molecules by retinal ganglion cells and by optic pathway glia accompanies the successful regeneration of retinal axons in adult zebrafish. *J Comp Neurol* 376(2):253-264.
15. Veldman MB, Bembem MA, Thompson RC, & Goldman D (2007) Gene expression analysis of zebrafish retinal ganglion cells during optic nerve regeneration identifies KLF6a and KLF7a as important regulators of axon regeneration. *Dev Biol* 312(2):596-612.
16. Kusik BW, Hammond DR, & Udvadia AJ (2010) Transcriptional regulatory regions of gap43 needed in developing and regenerating retinal ganglion cells. *Dev Dyn* 239(2):482-495.
17. Senut MC, Gulati-Leekha A, & Goldman D (2004) An element in the alpha1-tubulin promoter is necessary for retinal expression during optic nerve regeneration but not after eye injury in the adult zebrafish. *J Neurosci* 24(35):7663-7673.
18. Udvadia AJ, Koster RW, & Skene JH (2001) GAP-43 promoter elements in transgenic zebrafish reveal a difference in signals for axon growth during CNS development and regeneration. *Development* 128(7):1175-1182.
19. Bormann P, Zumsteg VM, Roth LWA, & Reinhard E (1998) Target contact regulates GAP-43 and alpha-tubulin mRNA levels in regenerating retinal ganglion cells. *J Neurosci Res* 52(4):405-419.

20. Beckers A, *et al.* (2019) An Antagonistic Axon-Dendrite Interplay Enables Efficient Neuronal Repair in the Adult Zebrafish Central Nervous System. *Mol Neurobiol* 56(5):3175-3192.
21. Park KK, *et al.* (2008) Promoting Axon Regeneration in the Adult CNS by Modulation of the PTEN/mTOR Pathway. *Science* 322(5903):963-966.
22. Diekmann H, Kalbhen P, & Fischer D (2015) Active mechanistic target of rapamycin plays an ancillary rather than essential role in zebrafish CNS axon regeneration. *Front Cell Neurosci* 9.
23. Buenostro JD, Wu B, Chang HY, & Greenleaf WJ (2015) ATAC-seq: A Method for Assaying Chromatin Accessibility Genome-Wide. *Curr Protoc Mol Biol* 109:21 29 21-29.
24. Udvardia AJ (2008) 3.6 kb Genomic sequence from Takifugu capable of promoting axon growth-associated gene expression in developing and regenerating zebrafish neurons. *Gene Expr Patterns* 8(6):382-388.
25. Daugherty AC, *et al.* (2017) Chromatin accessibility dynamics reveal novel functional enhancers in *C. elegans*. *Genome Res* 27(12):2096-2107.
26. Lambert SA, *et al.* (2018) The Human Transcription Factors. *Cell* 172(4):650-665.
27. Khan A, *et al.* (2018) JASPAR 2018: update of the open-access database of transcription factor binding profiles and its web framework. *Nucleic Acids Res* 46(D1):D260-D266.
28. Weirauch MT, *et al.* (2014) Determination and Inference of Eukaryotic Transcription Factor Sequence Specificity. *Cell* 158(6):1431-1443.
29. McLeay RC & Bailey TL (2010) Motif Enrichment Analysis: a unified framework and an evaluation on ChIP data. *BMC Bioinformatics* 11:165.
30. Miao Q, *et al.* (2014) Tcf3 promotes cell migration and wound repair through regulation of lipocalin 2. *Nat Commun* 5:4088.
31. Wagner KD, *et al.* (2002) The Wilms' tumor gene *Wt1* is required for normal development of the retina. *EMBO J* 21(6):1398-1405.
32. Grant CE, Bailey TL, & Noble WS (2011) FIMO: scanning for occurrences of a given motif. *Bioinformatics* 27(7):1017-1018.
33. Dixon JR, *et al.* (2012) Topological domains in mammalian genomes identified by analysis of chromatin interactions. *Nature* 485(7398):376-380.
34. Velasco S, *et al.* (2017) A Multi-step Transcriptional and Chromatin State Cascade Underlies Motor Neuron Programming from Embryonic Stem Cells. *Cell Stem Cell* 20(2):205-217 e208.
35. Rau A, Dhara SP, Udvardia AJ, & Auer PL (2019) Regeneration Rosetta: An interactive web application to explore regeneration-associated gene expression and chromatin accessibility. *bioRxiv*.
36. Westerfield M (1997) *The Zebrafish Book: A Guide for the Laboratory Use of Zebrafish (Danio rerio)*.
37. Manoli M & Driever W (2012) Fluorescence-activated cell sorting (FACS) of fluorescently tagged cells from zebrafish larvae for RNA isolation. *Cold Spring Harb Protoc* 2012(8).
38. Bray NL, Pimentel H, Melsted P, & Pachter L (2016) Near-optimal probabilistic RNA-seq quantification. *Nature Biotechnology* 34(5):525-527.
39. Li H & Durbin R (2009) Fast and accurate short read alignment with Burrows-Wheeler transform. *Bioinformatics* 25(14):1754-1760.
40. Li H, *et al.* (2009) The Sequence Alignment/Map format and SAMtools. *Bioinformatics* 25(16):2078-2079.
41. Zhang Y, *et al.* (2008) Model-based Analysis of ChIP-Seq (MACS). *Genome Biology* 9(9).
42. Lawrence M, *et al.* (2013) Software for Computing and Annotating Genomic Ranges. *Plos Comput Biol* 9(8).

43. Pimentel H, Bray NL, Puente S, Melsted P, & Pachter L (2017) Differential analysis of RNA-seq incorporating quantification uncertainty. *Nat Methods* 14(7):687-+.
44. Benjamini Y & Hochberg Y (1995) Controlling the False Discovery Rate - a Practical and Powerful Approach to Multiple Testing. *J R Stat Soc B* 57(1):289-300.
45. Gu Z, Eils R, & Schlesner M (2016) Complex heatmaps reveal patterns and correlations in multidimensional genomic data. *Bioinformatics* 32(18):2847-2849.
46. Love MI, Huber W, & Anders S (2014) Moderated estimation of fold change and dispersion for RNA-seq data with DESeq2. *Genome Biol* 15(12):550.
47. Zhu LJ, *et al.* (2010) ChIPpeakAnno: a Bioconductor package to annotate ChIP-seq and ChIP-chip data. *BMC Bioinformatics* 11:237.
48. Robinson JT, *et al.* (2011) Integrative genomics viewer. *Nat Biotechnol* 29(1):24-26.
49. Bailey TL, Johnson J, Grant CE, & Noble WS (2015) The MEME Suite. *Nucleic Acids Res* 43(W1):W39-49.
50. Supek F, Bosnjak M, Skunca N, & Smuc T (2011) REVIGO summarizes and visualizes long lists of gene ontology terms. *PLoS One* 6(7):e21800.

## Figure legends

**Fig. 1. Regeneration-associated genes display stage-specific expression after optic nerve injury.** (A) Schematic depicting stages of optic nerve regeneration from 0 – 12 days post-injury (dpi). (B) RNA-seq results generated from dissected retinas of adult zebrafish at 7-9 months of age. Transcripts from retinas dissected 2-12 days post optic nerve crush were compared with those from uninjured animals. Together, 7,480 transcripts were expressed at either higher (red = upregulated) or lower (blue = downregulated) levels in injured retina at 2, 4, 7, and/or 12 dpi when compared to control retinas (0 dpi). (C) Temporally clustered transcripts demonstrate stage-specific enrichment of canonical pathways. Expression heatmaps produced from Z-scores (calculated using transcripts per million [TPM] estimates). Mean normalized transcript counts were generated for each transcript across all samples at all time points. Each row represents a single transcript where each biological sample was compared to the mean, with red and blue indicating standard deviation above and below the mean, respectively. Each column represents one of the three biological replicates for each time point. Genes within each cluster were analyzed by Ingenuity Pathway Analysis (IPA) using  $-\log(p\text{-value}) > 4$ , to identify pathways expressed in a regeneration stage-specific manner.

**Fig. 2. Regeneration stage-specific gene expression changes are correlated with temporal changes in transcription factor expression rather than changes in chromatin accessibility.** (A) Genomic distribution of 42,198 high confidence regions of accessible chromatin, identified using ATAC-seq on samples of RGCs isolated from control and regenerating retinas using fluorescence activated cell sorting (FACS). High confidence regions consist of 500 bp sequences surrounding peaklet summits with  $p\text{-value} < 10^{-10}$ . The genic region includes 5'-untranslated regions (UTR), exons and introns. The intergenic region consist of sequences found between annotated genes. (B) Most transcriptionally accessible regions do not change over the course of regeneration when compared to uninjured control (0 dpi). Differentially accessible regions (233 total) were observed primarily at early (2 dpi) and late (12 dpi) stages of regeneration. (C) Temporal progression of transcription factors characterizes the distinct stages of regeneration. The expression heatmap of 205 differentially expressed transcripts represents 159 unique transcription factor (TF) genes. TSS, transcriptional start site.

**Fig. 3. Potential regulatory interactions between regeneration-associated transcription factors and putative promoters and enhancers.**

(A) Stacked bar graph of number of peaks enriched with transcription factor (TF) motif in the proximal (gray) and distal (black) sequences for each TF in the cluster axon growth towards midline (cluster 1 in Fig.1 ). (B) Heat map of shared TF motif enrichment in cluster1 accessible peaks. X-axis = number of shared TF motifs enriched in peaks, Y-axis = TF. Heatmap colors based on % of total peaks enriched for given TF. (C) Pair-wise co-occurrence of TF motifs found in the proximal and distal accessible regions surrounding the differentially expressed transcripts of cluster 1. Node color corresponds to TF family based on DNA-binding domain (DBD). bHLH, basic helix-loop-helix; bZIP, basic leucine zipper; C2H2 ZF, two cys, two his zinc finger; Ets, E26 transformation-specific; Rel, member of NF- $\kappa$ B family; STAT, signal transducer and activator of transcription. Node size corresponds to percentage of peaks enriched for given TF. Edge thickness corresponds to % shared enriched peaks.

**Fig. 4. *Jun* is a potential regulatory target of regeneration-associated promoters and enhancers.**

(A) IGV browser screenshot displaying accessible chromatin sequence pileups (blue) and expressed sequence pileups (green) surrounding *jun* gene at 0, 2, 4, 7, and 12 dpi. Red bars and

boxes indicate sequence determined to be differentially open at 2 dpi compared to control (0 dpi). Motif finding of sequences highlighted in red identified motifs corresponding to the JUN binding site. (B) Gene ontology (GO) analysis of inferred targets of JUN suggests roles in calcium regulation, microtubule dynamics, and translation. GO terms corresponding to JUN target genes were summarized, clustered and visualized using REVIGO (50). Node size corresponds to GO term frequency. Similar GO terms are linked by edges whose thickness corresponds to degree of similarity. (C) Inferred targets of JUN include 47 regeneration-associated TF genes. TF genes are grouped by transcription factor family: *violet*, leucine zipper; *yellow*, HMG/sox; *green*, helix-loop-helix; *dark blue*, STAT; *light blue*, hox; *orange*, nuclear receptor; *red*, C2H2 zinc finger; *white*, includes members of the AT hook, E2F, Ets, MBD, and TEA families as well as factors with uncategorized DNA binding domains.



## Figures

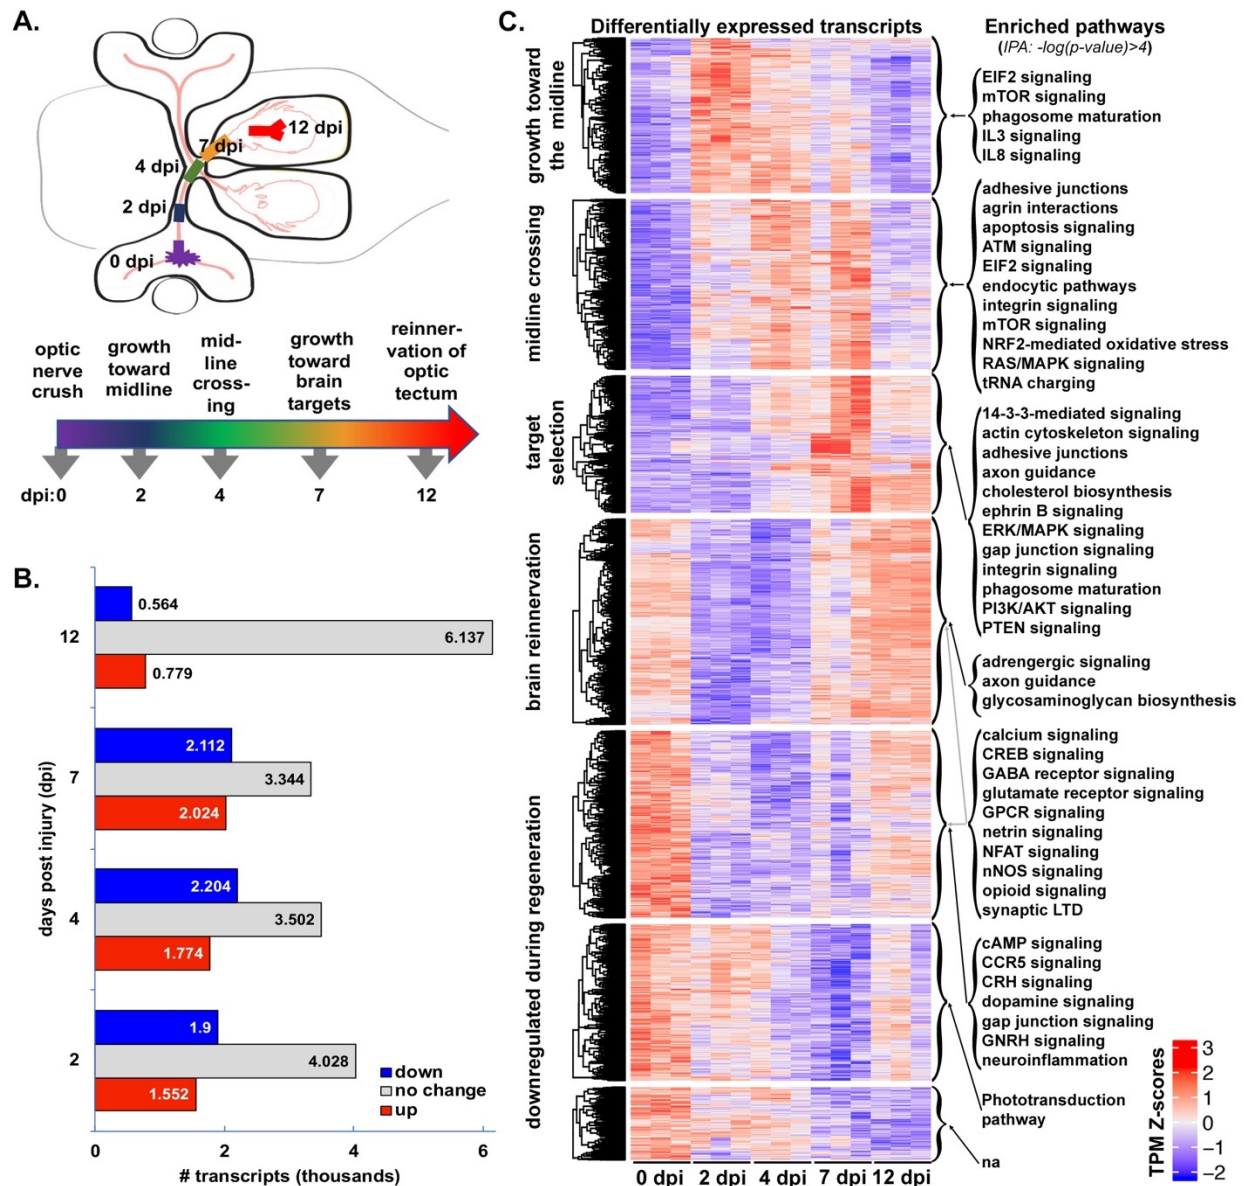

**Fig.1. Regeneration-associated genes display stage-specific expression after optic nerve injury.** (A) Schematic depicting stages of optic nerve regeneration from 0 – 12 days post-injury (dpi). (B) RNA-seq results generated from dissected retinas of adult zebrafish at 7-9 months of age. Transcripts from retinas dissected 2-12 days post optic nerve crush were compared with those from uninjured animals. Together, 7,480 transcripts were expressed at either higher (red = upregulated) or lower (blue = downregulated) levels in injured retina at 2, 4, 7, and/or 12 dpi when compared to control retinas (0 dpi). (C) Temporally clustered transcripts demonstrate stage-specific enrichment of canonical pathways. Expression heatmaps produced from Z-scores (calculated using transcripts per million [TPM] estimates). Mean normalized transcript counts were generated for each transcript across all samples at all time points. Each row represents a single transcript where each biological sample was compared to the mean, with red and blue indicating standard deviation above and below the mean, respectively. Each column represents

one of the three biological replicates for each time point. Genes within each cluster were analyzed by Ingenuity Pathway Analysis (IPA) using  $-\log(p\text{-value}) > 4$ , to identify pathways expressed in a regeneration stage-specific manner.

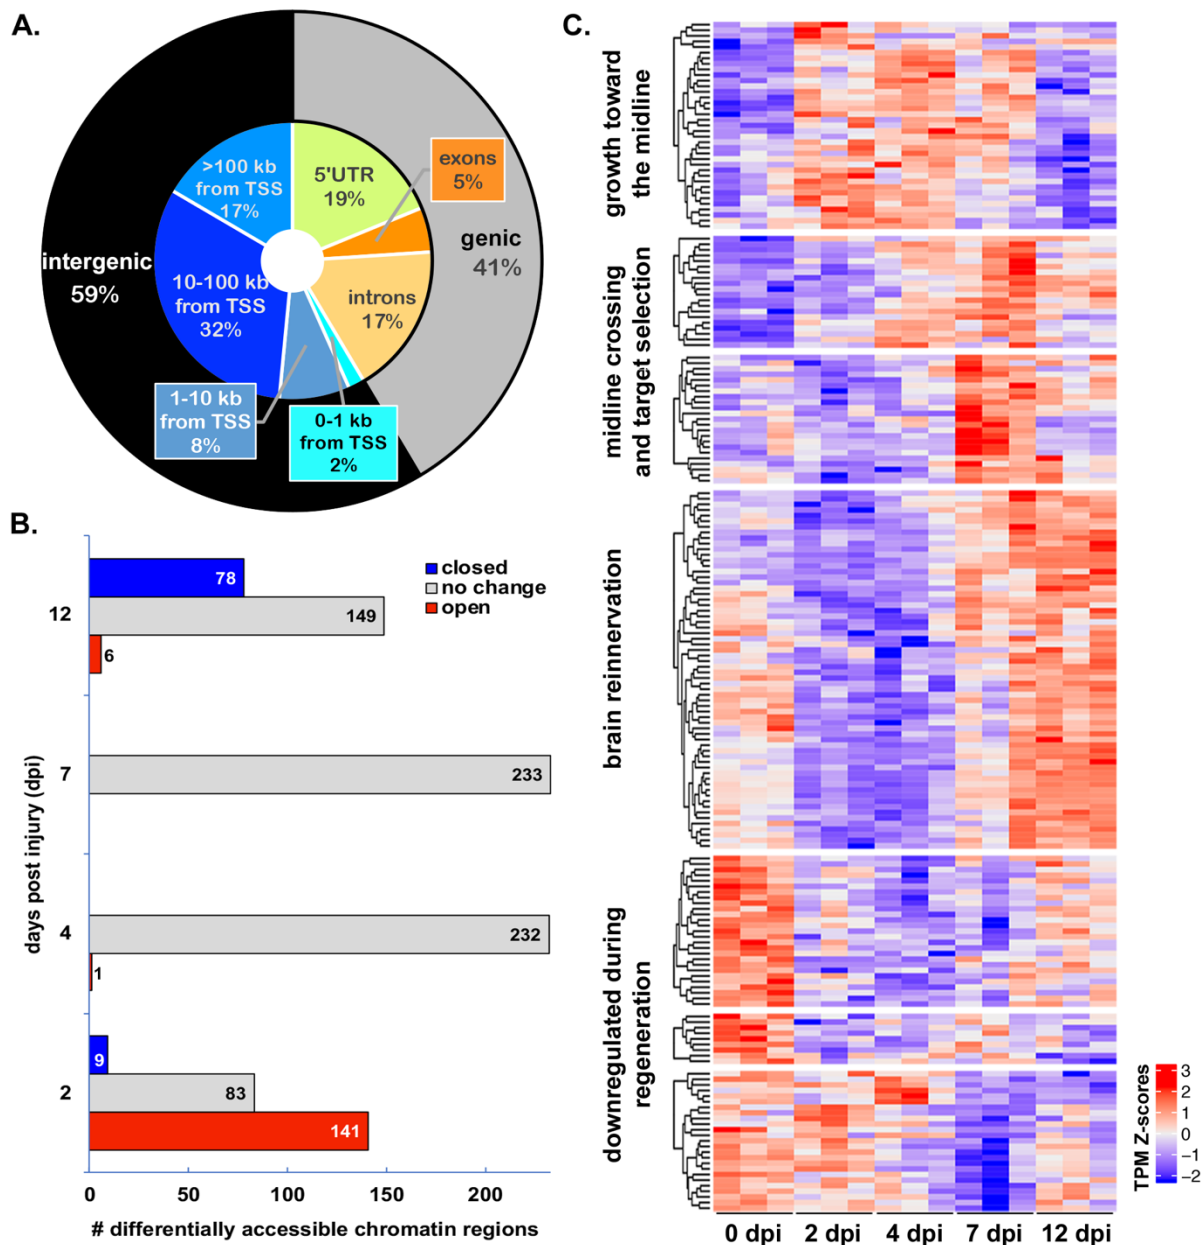

**Fig. 2. Regeneration stage-specific gene expression changes are correlated with temporal changes in transcription factor expression rather than changes in chromatin accessibility.**

(A) Genomic distribution of 42,198 high confidence regions of accessible chromatin, identified using ATAC-seq on samples of RGCs isolated from control and regenerating retinas using fluorescence activated cell sorting (FACS). High confidence regions consist of 500 bp sequences surrounding peaklet summits with  $p$ -value  $< 10^{-10}$ . The genic region includes 5'-untranslated regions (UTR), exons and introns. The intergenic region consist of sequences found between annotated genes. (B) Most transcriptionally accessible regions do not change over the course of regeneration when compared to uninjured control (0 dpi). Differentially accessible regions (233 total) were observed primarily at early (2 dpi) and late (12 dpi) stages of regeneration. (C) Temporal progression of transcription factors characterizes the distinct stages of regeneration.

The expression heatmap of 205 differentially expressed transcripts represents 159 unique transcription factor (TF) genes. TSS, transcriptional start site.

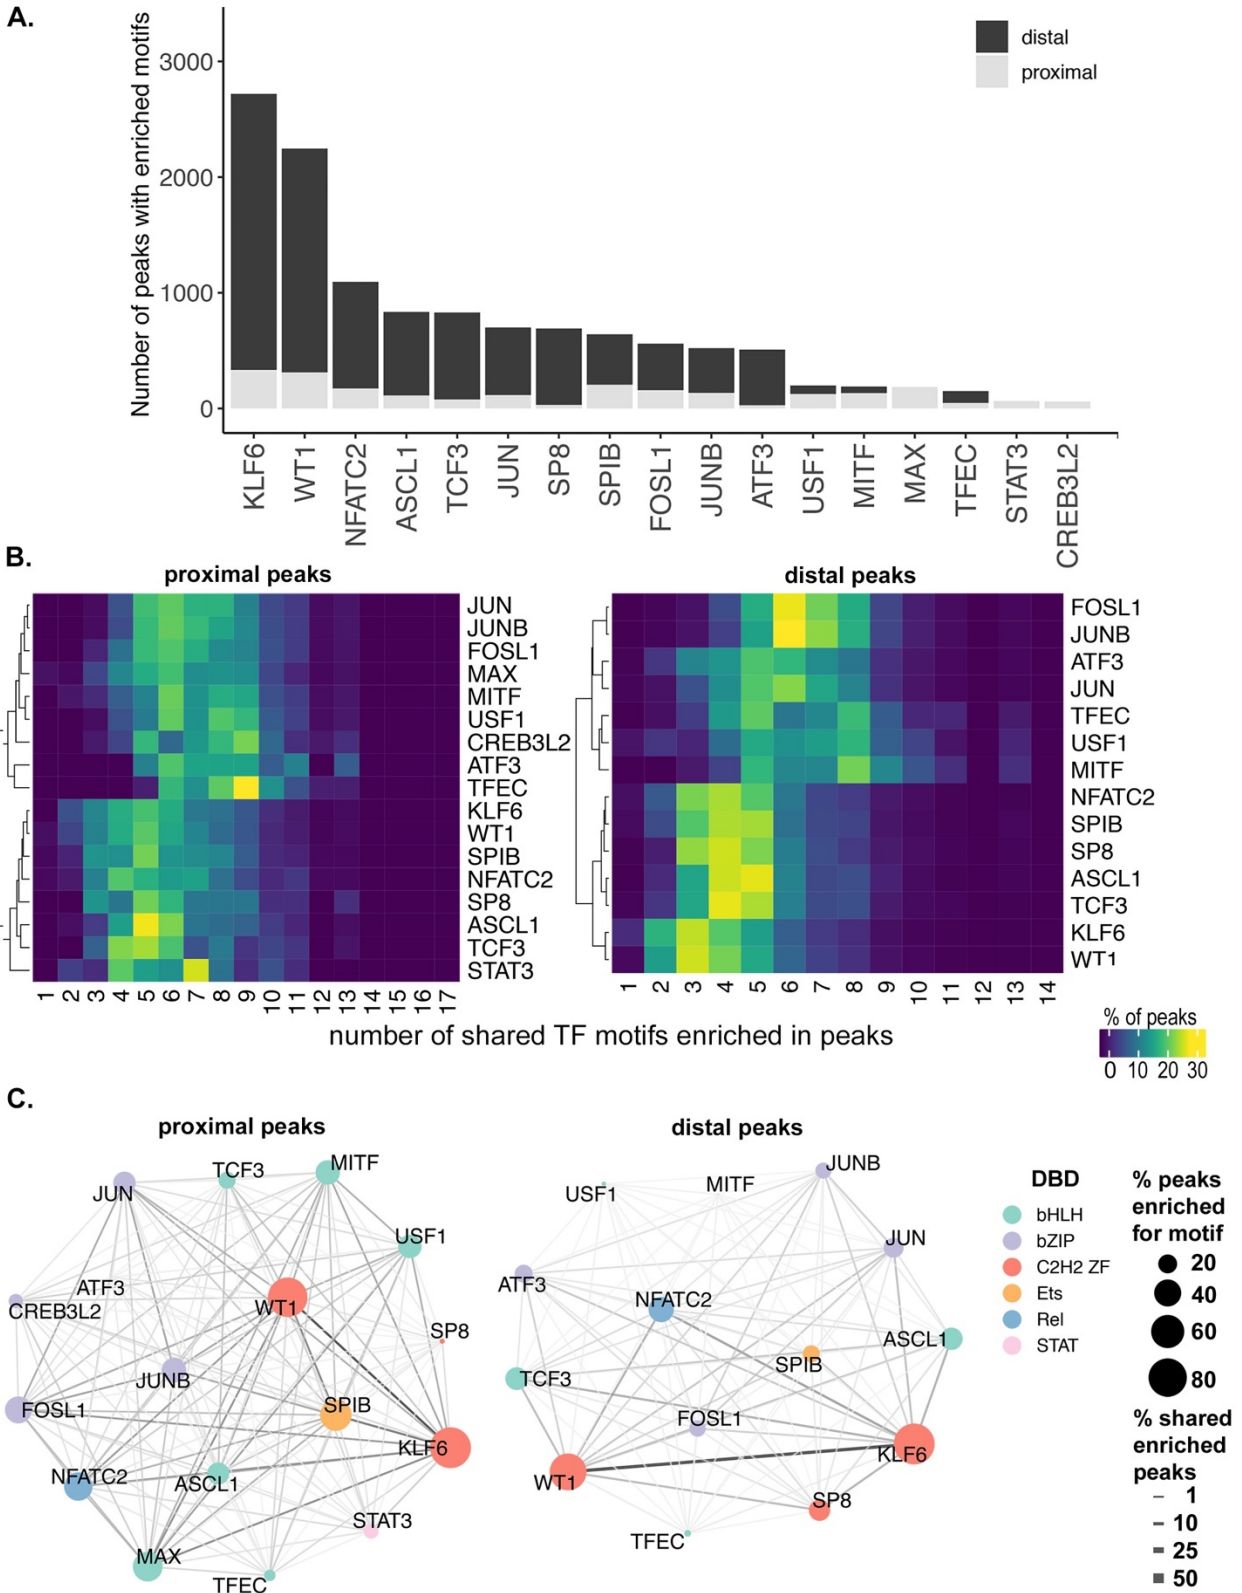

**Fig. 3. Potential regulatory interactions between regeneration-associated transcription**

### **factors and putative promoters and enhancers.**

(A) Stacked bar graph of number of peaks enriched with transcription factor (TF) motif in the proximal (gray) and distal (black) sequences for each TF in the cluster axon growth towards midline (cluster 1 in Fig.1 ). (B) Heat map of shared TF motif enrichment in cluster1 accessible peaks. X-axis = number of shared TF motifs enriched in peaks, Y-axis = TF. Heatmap colors based on % of total peaks enriched for given TF. (C) Pair-wise co-occurrence of TF motifs found in the proximal and distal accessible regions surrounding the differentially expressed transcripts of cluster 1. Node color corresponds to TF family based on DNA-binding domain (DBD). bHLH, basic helix-loop-helix; bZIP, basic leucine zipper; C2H2 ZF, two cys, two his zinc finger; Ets, E26 transformation-specific; Rel, member of NF- $\kappa$ B family; STAT, signal transducer and activator of transcription. Node size corresponds to percentage of peaks enriched for given TF. Edge thickness corresponds to % shared enriched peaks.

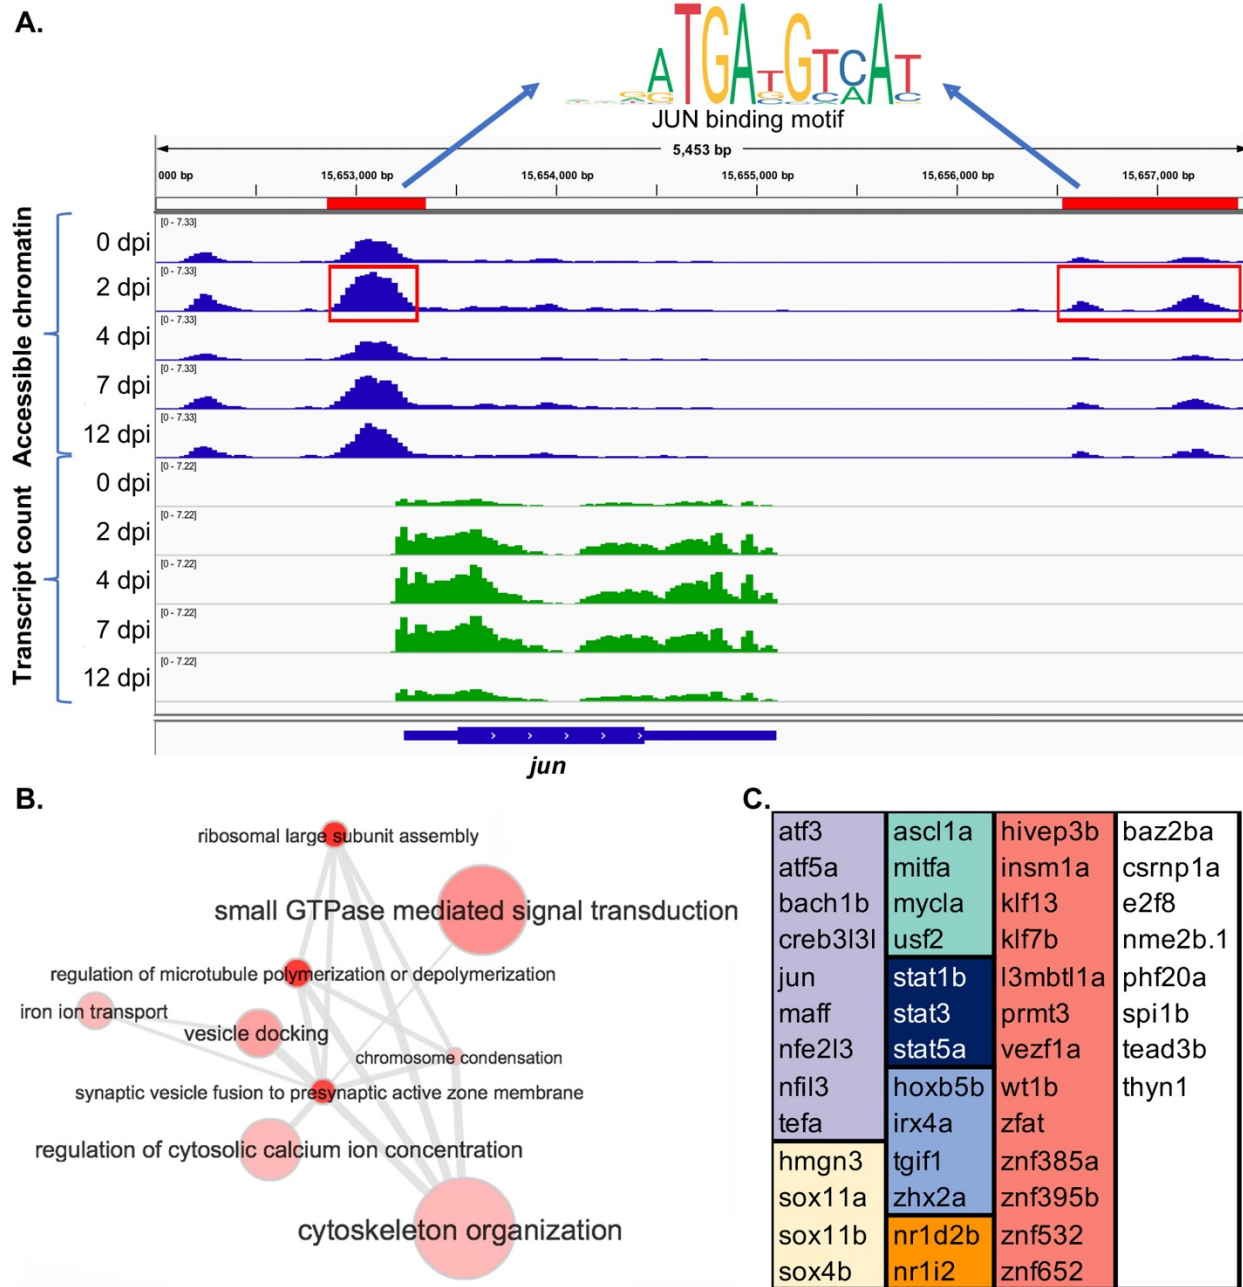

**Fig. 4. *Jun* is a potential regulatory target of regeneration-associated promoters and enhancers.**

(A) IGV browser screenshot displaying accessible chromatin sequence pileups (blue) and expressed sequence pileups (green) surrounding *jun* gene at 0, 2, 4, 7, and 12 dpi. Red bars and boxes indicate sequence determined to be differentially open at 2 dpi compared to control (0 dpi). Motif finding of sequences highlighted in red identified motifs corresponding to the JUN binding site. (B) Gene ontology (GO) analysis of inferred targets of JUN suggests roles in calcium regulation, microtubule dynamics, and translation. GO terms corresponding to JUN target genes were summarized, clustered and visualized using REVIGO (50). Node size corresponds to GO term frequency. Similar GO terms are linked by edges whose thickness corresponds to degree of similarity. (C) Inferred targets of JUN include 47 regeneration-associated TF genes. TF genes are grouped by transcription factor family: *violet*, leucine zipper; *yellow*, HMG/sox; *green*, helix-loop-

helix; *dark blue*, STAT; *light blue*, hox; *orange*, nuclear receptor; *red*, C2H2 zinc finger; *white*, includes members of the AT hook, E2F, Ets, MBD, and TEA families as well as factors with uncategorized DNA binding domains.
